# Supplementary material
Source: PubMed Central journal article supplement (PMC7772505)
Supplement: NIHMS1650921-supplement-1.pdf [file NIHMS1650921-supplement-1.pdf]

# Genome-wide association study of sepsis-associated acute respiratory distress syndrome in individuals of European ancestry

Beatriz Guillen-Guio, Jose M. Lorenzo-Salazar, Shwu-Fan Ma, Pei-Chi Hou, Tamara Hernandez-Beeftink, Almudena Corrales, M. Isabel García-Laorden, Jonathan Jou, Elena Espinosa, Arturo Muriel, David Domínguez, Leonardo Lorente, María M. Martín, Carlos Rodríguez-Gallego, Jordi Solé-Violán, Alfonso Ambrós, Demetrio Carriedo, Jesús Blanco, José M. Añón, John P. Reilly, Tiffanie K. Jones, Caroline A.G. Ittner, Rui Feng, Franziska Schönebeck, Michael Kiehntopf, Imre Noth, Markus Scholz, Frank M. Brunkhorst, André Scherag, Nuala J. Meyer, Jesús Villar, and Carlos Flores.

## Appendix

### The GEN-SEP cohort

GEN-SEP is a national, multicenter, observational study conducted in a Spanish network of 11 intensive care units (ICUs) between 2,002 and 2,017. The list of Spanish hospitals involved in this study are: Hospital Universitario de Canarias, Tenerife; Hospital Universitario NS de Candelaria, Tenerife; Hospital Universitario Río Hortega, Valladolid; Hospital Universitario Dr. Negrin, Gran Canaria; Hospital General de Ciudad Real, Ciudad Real; Complejo Hospitalario Universitario de León, León; Hospital Virgen de la Luz, Cuenca; Complejo Hospitalario Universitario de Santiago de Compostela, Santiago de Compostela; Fundació Althaia-Manresa, Barcelona; Hospital Clinic, Barcelona; and Hospital Clínico de Valladolid, Valladolid.

A total of 672 patients with sepsis<sup>1</sup> were included in this stage and diagnosed with ARDS based on Berlin definition criteria:<sup>2</sup> 1) acute onset with PaO<sub>2</sub>/FiO<sub>2</sub> <300 mmHg, 2) bilateral pulmonary infiltrates on frontal chest radiograph, 3) use of invasive mechanical ventilation, and 4) no evidence of cardiac failure. Controls were those sepsis patients that did not develop ARDS during their ICU stay.

Four ml of peripheral blood were withdrawn at the time of inclusion into the study and stored at -20°C until use. DNA was extracted using the Illustra™ blood genomicPrep Mini Spin Kit (GE Healthcare), quantified with a Qubit 3.0 fluorometer (Thermo Fisher Scientific), and stored at -20°C until use. Samples with a low concentration of DNA (<10 ng/μl) were cleaned and concentrated using the RealClean & concentrator microspin kit (Real Laboratory).

### Genotyping and quality control in discovery and replication stages

For the discovery stage, a total of 587,352 SNPs were genotyped in the National Genotyping Centre (CeGen) using the Axiom Genome-Wide Human CEU 1 Array (Affymetrix). Variant calling was performed in a single batch for all samples using AffyPipe<sup>3</sup> following the authors' recommendations to fine tune the filtering of low quality SNPs and samples. PLINK v1.90<sup>4</sup> and R 3.3.2<sup>5</sup> tools were used to conduct quality controls. Samples with missing clinical information, genotype call rates < 95%, sex mismatches between genotypes and the clinical data, samples with high degree of kinship (PIHAT>0.2), and heterozygosity outliers were removed. Variants with low minor allele frequency (MAF<0.01), genotype call rates (CR) < 95%, or deviated from Hardy Weinberg equilibrium expectations (HWE,  $p < 1.0 \times 10^{-6}$ ) were excluded. Additionally, a Principal Component (PC) analysis (PCA) was conducted to reduce the effects of population stratification in the analysis. For this purpose, we removed SNPs located at known regions that are in long-distance linkage disequilibrium (LD). We then pruned SNPs in high LD using the function "indep-pairwise" of PLINK, setting a  $r^2$  of 0.15 to keep approximately 100,000 independent variants. After excluding eight ancestry outliers, the two first PCs for the discovery sample were plotted overlaid with the HapMap3 populations.<sup>6</sup> The PCA evidenced the similarity between the GEN-SEP samples included in the discovery stage and the European population from HapMap (Supplementary Figure 1).

In the MESSI study, SNPs were genotyped using the Affymetrix Axiom TxArray v.1 (Affymetrix). As described elsewhere,<sup>7</sup> variants were filtered if they were located on sex chromosomes, had a MAF<5%, had a missing genotype rate of >10%, or if deviated from HWE ( $p < 1.0 \times 10^{-3}$ ). In the SepNet study, HumanOmniExpressExome arrays (Illumina, Inc.) were used for variant genotyping. As described elsewhere,<sup>8</sup> individuals with sex mismatches, missing sex records, CR<98%, implausible heterozygosity

54 (<20% and >26%), and ancestry outliers based on the PCA were removed. Variants with  $CR \leq 95\%$ ,  
55  $MAF < 1\%$ , or deviated from HWE ( $p < 1.0 \times 10^{-6}$ ) were also excluded.

56

#### 57 **Statistical analyses for discovery stage**

58 For variant imputation, phasing was conducted with SHAPEIT v2.r790<sup>9</sup> and the Haplotype Reference  
59 Consortium (HRC) version r.1.1 data were used as the reference panel<sup>10</sup> on the Michigan Imputation  
60 Server<sup>11</sup>. Logistic regression models assuming an additive inheritance were carried out using EPACTS  
61 v3.2.6<sup>12</sup> based on the Wald test. We included sex, age, and the Acute Physiology and Chronic Health  
62 Evaluation II (APACHE II) score as covariates. For the variants in the X chromosome, variant imputation  
63 and association tests were conducted separately in males and females, and results were subsequently meta-  
64 analysed with METASOFT v2.0.1<sup>13</sup>. Fixed-effects or Han and Eskin's Random Effects models were used  
65 depending on the significance of the Cochran's Q statistic. Variants with low allele frequency ( $MAF < 1\%$ )  
66 or with a low imputation quality ( $Rsq < 0.3$ ) were excluded from the analysis. The genomic inflation factor  
67 ( $\lambda$ ) of the results was calculated with the GenABEL package v1.8-0.<sup>14</sup>

68 GCTA-COJO 1.26.0<sup>15</sup> was used for conditional regression analyses to identify independent loci taking into  
69 account the underlying LD structure in the study sample. Independent variants showing a  $p < 5.0 \times 10^{-5}$  were  
70 followed up in the replication stage. Regional association plots were generated using LocusZoom<sup>16</sup> based  
71 on LD information of European populations from the 1000 Genomes Project (1KGP)<sup>17</sup> and gene  
72 information from the UCSC browser data.

73

#### 74 **Statistical analyses for replication stage**

75 Pre-phasing and variant imputation in MESSI were conducted with MACH v1.0,<sup>18</sup> using the European  
76 population from 1KGP Phase 1 v2 as the reference panel. Logistic regression models were performed  
77 assuming additive inheritance using R 3.3.2 stats package (glm function, binomial distribution),<sup>5</sup>  
78 considering the first two PCs, age, and sex as covariates. All the investigated variants in MESSI had a  $MAF$   
79  $> 1\%$  and  $Rsq > 0.3$ . As described elsewhere,<sup>8</sup> for the SepNet study SHAPEIT v2.r790<sup>9</sup> was utilized for pre-  
80 phasing, and IMPUTE2 v2.3.1<sup>19</sup> was used for variant imputation considering the 1KGP Phase 1 v3 data as  
81 the reference panel. Logistic regressions were performed with SNPTEST v2.5,<sup>19</sup> which included the first  
82 three PCs, sex, age, and APACHE II as covariates. All the assessed variants in SepNet had  $MAF > 1\%$ , no  
83 evidence for deviations from HWE ( $p > 1.0 \times 10^{-10}$ ) and an INFO Score  $> 0.8$ . To combine the results from  
84 MESSI and SepNet, a meta-analysis was assessed using METASOFT v2.0.1.<sup>13</sup>

85

#### 86 **Meta-analysis of discovery and replication stages**

87 A meta-analysis across discovery and replication stages was performed with METASOFT v2.0.1<sup>13</sup> to  
88 estimate the overall effect size of the SNPs reaching nominal significance in replication stage. Fixed-effects  
89 or Han and Eskin's Random-effects models were used based on the Cochran's Q test significance. Genome-  
90 wide significance was declared with a meta-analysed significance of  $p < 9.26 \times 10^{-8}$  according to the most  
91 recent empirical estimations in European populations.<sup>20</sup> The same approximation was used for the  
92 sensitivity analysis of the association of the sentinel variant.

93

#### 94 **Statistical power**

95 Statistical power was estimated using the Genetic Association Study (GAS) Power Calculator.<sup>21</sup> We  
96 assumed a multiplicative model, a GWAS with a sample size of 630 cases and 1,302 controls, a relative  
97 risk of 1.5 and a prevalence of 0.1, the study had 80.4% statistical power for detecting associated variants  
98 with  $MAF$  of 0.30 or greater at significance level of  $p < 9.26 \times 10^{-8}$ .

99

100

101

102

103 ***FLT1* and *VEGFA* gene expression and functional annotation of genetic variants**

104 Total RNAs from nine lung biopsies of healthy individuals obtained from the Gift of Hope Network  
105 Regional Organ Bank of Il (GOH/ROBI) were isolated and subjected to RNA-sequencing. Expression  
106 levels of *FLT1* and *VEGFA* were expressed in counts per million (Shwu-Fan Ma and Imre Noth, personal  
107 communication). Additionally, the ExAtlas tool<sup>22</sup> was used to explore public gene expression data available  
108 (GSE32707) from a peripheral blood transcriptomics analysis in 88 critically-ill adult patients that were  
109 evaluated for sepsis and ARDS.<sup>23</sup> For this analysis we used ANOVA followed by pairwise Student's *t*-tests  
110 to assess the differences in average intensities of the array probe targeting *FLT1* (ILMN\_1752307, which  
111 targets exon 30, that is found in the canonical isoform FLT1-201) and *VEGFA* (ILMN\_2375879,  
112 ILMN\_1693060, and ILMN\_1803882) between ICU controls (n=34), systemic inflammatory response  
113 syndrome (SIRS, n=21), sepsis (n=30), and sepsis-associated ARDS patients (n=18) at study inclusion. We  
114 report uncorrected two-sided *p*-values.

115 Next, we used a combination of tools and datasets to evaluate the regulatory potential of the associated  
116 variants in gene expression (through epigenetic mechanisms, long-distance physical interactions, and  
117 tissue-specific cis-eQTLs), and the likelihood of deleteriousness. These included Capture Hi-C Plotter  
118 (CHiCP),<sup>24</sup> DeepSea,<sup>25</sup> DSNetwork,<sup>26</sup> GTEx Analysis Release V7,<sup>27</sup> HaploReg v4.1,<sup>28</sup> Open Targets  
119 Genetics,<sup>29</sup> RegulomeDB,<sup>30</sup> SNPdelScore,<sup>31</sup> TIVAN,<sup>32</sup> and Variant Effect Predictor (VEP).<sup>33</sup>

120 CHiCP allows for the determination of empirically-observed physical interactions between distal DNA  
121 regulatory elements and gene promoters in multiple tissues. DeepSea predicts the epigenetics state of a  
122 sequence and prioritize regulatory variants by calculating functional significance scores, while DSNetwork  
123 allows for the selection of the most probable functional SNP from a list of variants according to nearly sixty  
124 prediction approaches. The GTEx Portal allows for the study of Single-Tissue expression quantitative trait  
125 loci (eQTL) and tissue-specific gene expression and regulation. HaploReg, Open Targets Genetics, and  
126 RegulomeDB explore annotations of coding and non-coding variants integrating data from chromatin  
127 states, regulatory motifs, eQTLs, pQTLs, DNase I hypersensitive sites, enhancer-transcription start sites,  
128 and promoter capture Hi-C experiments from different cell lines. Open Targets Genetics puts functional  
129 information in the context of the UK Biobank association evidence, allowing one to link each variant to its  
130 proximal and distal target gene(s), using a single evidence score. SNPdelScore combines different methods  
131 to address deleterious effects of noncoding variants, including the CellulAr dePendent dEactivating (CAPE)  
132 mutations predictor. Finally, TIVAN allows for the prediction of tissue-specific cis-eQTL single nucleotide  
133 variants, and VEP determines the effect of the variants analysed on genes, transcripts, protein sequence,  
134 and regulatory regions.

135

136 **Constructs, transient transfections, and dual-luciferase reporter assays**

137 A Dual-Luciferase Reporter Assay System® (Promega, Madison, WI) was used to evaluate the potential  
138 regulatory effect of the ARDS-associated variant on promoter activity. The reporter construct was generated  
139 by synthesizing (GenScript Inc, Piscataway, NJ) a fragment of 1,032 bp of the *FLT1* promoter (Ensembl  
140 ID: ENSR00000060438) plus 284 bp of the 5' UTR of exon one and 784 bp of the upstream sequence  
141 (chr13: 29,068,982-29,070,013; GRCh37/hg19 coordinates), and inserting it into a promoterless pGL4.10  
142 [luc2] luciferase reporter vector (Promega). This *FLT1* promoter region was chosen for having the highest  
143 activity *in vitro* in a previous characterization of the gene promoter.<sup>34</sup> In addition, two regulatory constructs  
144 were generated by synthesizing (GenScript Inc, Piscataway, NJ) a 1.9 kb intron 10 fragment containing  
145 either the reference or alternative alleles of the most significantly associated variant within *FLT1* and its  
146 perfect LD proxies (i.e. rs9508032, rs9508034, rs722503, rs8002446, rs9513111,  $r^2=1.0$ ) in Europeans  
147 (chr13: 28,995,800-28,997,700; GRCh37/hg19 coordinates) and inserting them into the reporter construct.

148 The constructed plasmids (50 ng DNA each) and the control plasmid pGL4.74 [hRluc/Tk] (10 ng DNA)  
149 were transiently co-transfected into human lung epithelial (A549) or peripheral blood monocyte (THP-1)  
150 cell lines using the TransIT®-LT1 Transfection Reagent (Mirus Bio LLC, Madison, WI) following  
151 manufacturer's protocol. A549 and THP-1 cells were separately grown in 10% DMEM or 10% RPM 1640  
152 media, respectively, and were plated into white 96-well plates until confluency. Twenty-four hours after  
153 transfection, cells were collected and luminescence was measured by Dual-Luciferase Reporter Assay  
154 System according to manufacturer's instructions using a Cytation5 plate reader (BioTek, Winooski, VT).  
155 Luminescence experiments were performed four to eight times, with each transfection in triplicate.  
156 Following manufacturer's instructions,<sup>35</sup> to reduce variability, simplify comparisons and improve  
157 significance, promoter activities were expressed as the relative response ratio of *Firefly* luciferase/Renilla  
158 luciferase luminescence according to the formula:

159  
160  
161  
162  
163  
164  
165  
166  
167  
168  
169  
170  
171  
172  
173  
174  
175  
176  
177  
178  
179  
180  
181  
182  
183  
184  
185  
186  
187  
188  
189  
190  
191  
192  
193  
194  
195  
196  
197  
198  
199  
200  
201  
202  
203

$$\text{Relative response ratio} = \frac{(\text{experimental sample ratio}) - (\text{negative control ratio})}{(\text{positive control ratio}) - (\text{negative control ratio})}$$

We considered the construct including only the *FLT1* promoter as the positive control and the promoterless construct as the negative control (see figure 4A). Mean differences among the independent experimental groups were assessed by non-parametric Wilcoxon signed-rank test. Again, we report uncorrected two-sided *p*-values.

### Literature mining of previously reported ARDS-associated genes

In order to evaluate genes that were previously associated with ARDS, we conducted a bibliographic search on PubMed for all studies reporting genes which were significantly associated with ARDS from December 2015 to November 2018. This updated result was merged with a list of all published studies we collected up to December 2015 available elsewhere.<sup>36-38</sup> For that search, we used combinations of the terms “acute respiratory distress syndrome”, “ARDS” OR “acute lung injury” with “polymorphism” OR “genetic variant” and retrieved seven publications reporting five additional candidate ARDS genes in adults. Association results in the discovery stage were extracted and an effective number of independent signals per gene was measured using the Genetic Type I Error Calculator<sup>39</sup> in order to adjust for multiple testing. Significant association was declared if any of the individual variants surpassed one of two Bonferroni-corrected significant levels. We considered a study-wise adjustment accounting for all the independent tests across all genes, and a gene-wise adjustment just accounting - i.e. adjusting for the independent variants mapping at individual genes.

### Evaluation of *FLT1* variants in a trauma-associated ARDS cohort

We evaluated if the *FLT1* sentinel variant and perfect proxies also associated with non-sepsis ARDS. For that, we accessed the table S2 of the only GWAS of trauma-associated ARDS published to date,<sup>40</sup> containing publicly available (but incomplete) summary data. We found that none of the *FLT1* variants that achieved genome-wide significance in sepsis-associated ARDS were present in that study because of the reference panel used for variant imputation. Despite this, it was reassuring to find that out of 13 *FLT1* SNPs listed (all within a region of 31 kb and showing nominally significant associations with ARDS after trauma), six were also located in intron 10 (*p*-values in the range of  $9.15 \times 10^{-4}$  to  $2.44 \times 10^{-3}$ ). However, their LD with the sentinel variant of our study was weak in Europeans ( $r^2=0.13$ ).

## 204 **References**

205

- 206 1 Singer M, Deutschman CS, Seymour CW, *et al.* The Third International Consensus Definitions for  
207 Sepsis and Septic Shock (Sepsis-3). *JAMA* 2016; **315**: 801–10.
- 208 2 ARDS Definition Task Force, Ranieri VM, Rubenfeld GD, *et al.* Acute respiratory distress  
209 syndrome: the Berlin Definition. *JAMA* 2012; **307**: 2526–33.
- 210 3 Nicolazzi EL, Iamartino D, Williams JL. AffyPipe: an open-source pipeline for Affymetrix Axiom  
211 genotyping workflow. *Bioinformatics* 2014; **30**: 3118–9.
- 212 4 Chang CC, Chow CC, Tellier LC, Vattikuti S, Purcell SM, Lee JJ. Second-generation PLINK:  
213 rising to the challenge of larger and richer datasets. *Gigascience* 2015; **4**: 7.
- 214 5 R Core Team. R: A language and environment for statistical computing. *R Found Stat Comput*  
215 *Vienna, Austria* 2013. <http://www.r-project.org/>. Accessed September 2017.
- 216 6 International HapMap 3 Consortium, Altshuler DM, Gibbs RA, *et al.* Integrating common and rare  
217 genetic variation in diverse human populations. *Nature* 2010; **467**: 52–8.
- 218 7 Reilly JP, Wang F, Jones TK, *et al.* Plasma angiopoietin-2 as a potential causal marker in sepsis-  
219 associated ARDS development: evidence from Mendelian randomization and mediation analysis.  
220 *Intensive Care Med* 2018; **44**: 1849–58.
- 221 8 Scherag A, Schöneweck F, Kesselmeier M, *et al.* Genetic Factors of the Disease Course after  
222 Sepsis: A Genome-Wide Study for 28Day Mortality. *EBioMedicine* 2016; **12**: 239–46.
- 223 9 Delaneau O, Howie B, Cox AJ, Zagury J-F, Marchini J. Haplotype estimation using sequencing  
224 reads. *Am J Hum Genet* 2013; **93**: 687–96.
- 225 10 McCarthy S, Das S, Kretzschmar W, *et al.* A reference panel of 64,976 haplotypes for genotype  
226 imputation. *Nat Genet* 2016; **48**: 1279–83.
- 227 11 Das S, Forer L, Schönherr S, *et al.* Next-generation genotype imputation service and methods. *Nat*  
228 *Genet* 2016; **48**: 1284–7.
- 229 12 Kang H. Efficient and parallelisable association container toolbox (EPACTS).  
230 <http://genome.sph.umich.edu/wiki/EPACTS> 2014. Accessed October 2017.
- 231 13 Han B, Eskin E. Random-Effects Model Aimed at Discovering Associations in Meta-Analysis of  
232 Genome-wide Association Studies. *Am J Hum Genet* 2011; **88**: 586–98.
- 233 14 Aulchenko YS, Ripke S, Isaacs A, van Duijn CM. GenABEL: an R library for genome-wide  
234 association analysis. *Bioinformatics* 2007; **23**: 1294–6.
- 235 15 Zhu Z, Zheng Z, Zhang F, *et al.* Causal associations between risk factors and common diseases  
236 inferred from GWAS summary data. *Nat Commun* 2018; **9**: 224.
- 237 16 Pruim RJ, Welch RP, Sanna S, *et al.* LocusZoom: regional visualization of genome-wide  
238 association scan results. *Bioinformatics* 2010; **26**: 2336–7.
- 239 17 1000 Genomes Project Consortium RA, Auton A, Brooks LD, *et al.* A global reference for human  
240 genetic variation. *Nature* 2015; **526**: 68–74.
- 241 18 Li Y, Willer CJ, Ding J, Scheet P, Abecasis GR. MaCH: using sequence and genotype data to  
242 estimate haplotypes and unobserved genotypes. *Genet Epidemiol* 2010; **34**: 816–34.
- 243 19 Marchini J, Howie B, Myers S, McVean G, Donnelly P. A new multipoint method for genome-  
244 wide association studies by imputation of genotypes. *Nat Genet* 2007; **39**: 906–13.
- 245 20 Kanai M, Tanaka T, Okada Y. Empirical estimation of genome-wide significance thresholds based  
246 on the 1000 Genomes Project data set. *J Hum Genet* 2016; **61**: 861–6.
- 247 21 Johnson JL, Abecasis GR. GAS Power Calculator: web-based power calculator for genetic

248 association studies. *bioRxiv* 2017. Doi: <https://doi.org/10.1101/164343>.

249 22 Sharov AA, Schlessinger D, Ko MSH. ExAtlas: An interactive online tool for meta-analysis of  
250 gene expression data. *J Bioinform Comput Biol* 2015; **13**: 1550019.

251 23 Dolinay T, Kim YS, Howrylak J, *et al*. Inflammasome-regulated cytokines are critical mediators of  
252 acute lung injury. *Am J Respir Crit Care Med* 2012; **185**: 1225–34.

253 24 Schofield EC, Carver T, Achuthan P, *et al*. CHiCP: a web-based tool for the integrative and  
254 interactive visualization of promoter capture Hi-C datasets. *Bioinformatics* 2016; **32**: 2511–3.

255 25 Zhou J, Troyanskaya OG. Predicting effects of noncoding variants with deep learning-based  
256 sequence model. *Nat Methods* 2015; **12**: 931–4.

257 26 Lemaçon A, Scott-Boyer M-P, Soucy P, Ongaro-Carcy R, Simard J, Droit A. DSNetwork: An  
258 integrative approach to visualize predictions of variants' deleteriousness. *bioRxiv* 526335 2019.  
259 Doi:<https://doi.org/10.1101/526335>.

260 27 GTEx Consortium J, Thomas J, Salvatore M, *et al*. The Genotype-Tissue Expression (GTEx)  
261 project. *Nat Genet* 2013; **45**: 580–5.

262 28 Ward LD, Kellis M. HaploReg: a resource for exploring chromatin states, conservation, and  
263 regulatory motif alterations within sets of genetically linked variants. *Nucleic Acids Res* 2012; **40**:  
264 D930–4.

265 29 Carvalho-Silva D, Pierleoni A, Pignatelli M, *et al*. Open Targets Platform: new developments and  
266 updates two years on. *Nucleic Acids Res* 2019; **47**: D1056–65.

267 30 Boyle AP, Hong EL, Hariharan M, *et al*. Annotation of functional variation in personal genomes  
268 using RegulomeDB. *Genome Res* 2012; **22**: 1790–7.

269 31 Vera Alvarez R, Li S, Landsman D, Ovcharenko I. SNPDelScore: combining multiple methods to  
270 score deleterious effects of noncoding mutations in the human genome. *Bioinformatics* 2017; **34**:  
271 289–91.

272 32 Chen L, Wang Y, Yao B, Mitra A, Wang X, Qin X. TIVAN: Tissue-specific cis-eQTL single  
273 nucleotide variant annotation and prediction. *Bioinformatics* 2018; published online Oct 10.  
274 Doi:10.1093/bioinformatics/bty872.

275 33 McLaren W, Gil L, Hunt SE, *et al*. The Ensembl Variant Effect Predictor. *Genome Biol* 2016; **17**:  
276 122.

277 34 Morishita K, Johnson DE, Williams LT. A novel promoter for vascular endothelial growth factor  
278 receptor (flt-1) that confers endothelial-specific gene expression. *J Biol Chem* 1995; **270**: 27948–  
279 53.

280 35 Eggers C, Hook B, Lewis S, Strayer C, Landreman A. Designing a Bioluminescent Reporter Assay:  
281 Normalization. *Promega Corp. Web site*. [http://www.promega.es/resources/pubhub/designing-a-](http://www.promega.es/resources/pubhub/designing-a-bioluminescent-reporter-assay-normalization/)  
282 [bioluminescent-reporter-assay-normalization/](http://www.promega.es/resources/pubhub/designing-a-bioluminescent-reporter-assay-normalization/) 2016. Accessed April 23, 2019.

283 36 Flores C, Pino-Yanes M del M, Villar J. A quality assessment of genetic association studies  
284 supporting susceptibility and outcome in acute lung injury. *Crit Care* 2008; **12**: R130.

285 37 Acosta-Herrera M, Pino-Yanes M, Perez-Mendez L, Villar J, Flores C. Assessing the quality of  
286 studies supporting genetic susceptibility and outcomes of ARDS. *Front Genet* 2014; **5**: 20.

287 38 Guillén-Guío B, Acosta-Herrera M, Villar J, Flores C. Genetics of Acute Respiratory Distress  
288 Syndrome. *eLS. John Wiley Sons* 2016. DOI: 10.4046/trd.2001.51.1.5

289 39 Li M-X, Yeung JMY, Cherny SS, Sham PC. Evaluating the effective numbers of independent tests  
290 and significant p-value thresholds in commercial genotyping arrays and public imputation reference  
291 datasets. *Hum Genet* 2012; **131**: 747–56.

292 40 Christie JD, Wurfel MM, Feng R, *et al*. Genome wide association identifies PPF1A1 as a candidate  
293 gene for acute lung injury risk following major trauma. *PLoS One* 2012; **7**: e28268.

294 **Supplementary Figures**

295

296 **Supplementary Figure 1. Principal component analysis.** Plot of the first two principal components (PC)  
297 of individuals analyzed in the discovery stage were projected on the HapMap3 reference dataset.  
298  
299

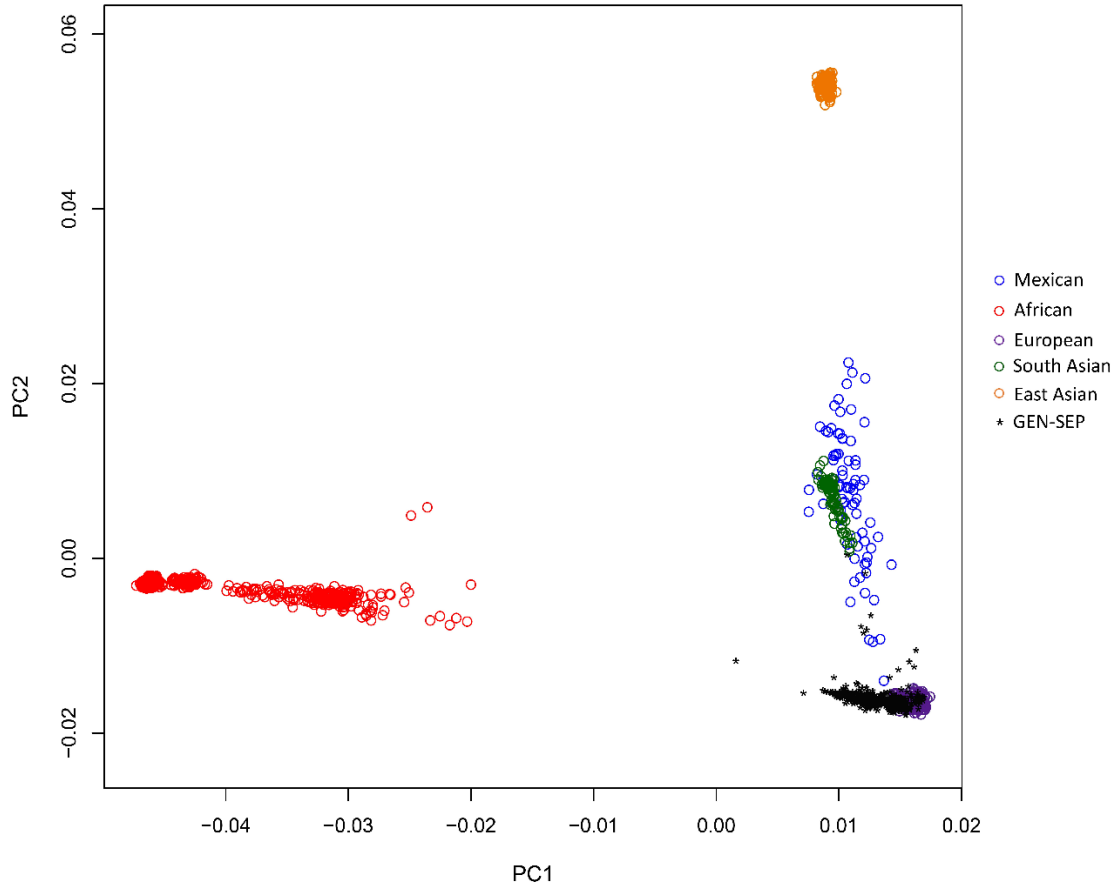

300  
301  
302  
303  
304  
305  
306  
307  
308  
309  
310  
311  
312  
313  
314  
315  
316  
317  
318  
319  
320  
321  
322  
323

324 **Supplementary Figure 2. Quantile-Quantile (Q-Q) plot.** Observed versus expected  $-\log_{10} p$ -values for  
325 the GWAS results of the discovery stage.  
326  
327

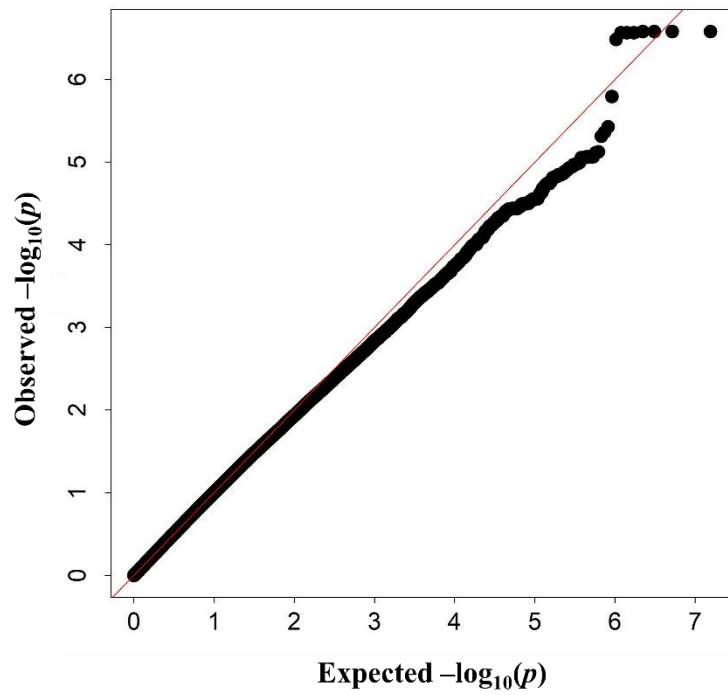

328  
329  
330  
331  
332  
333  
334  
335  
336  
337  
338  
339  
340  
341  
342  
343  
344  
345  
346  
347  
348  
349  
350  
351  
352  
353  
354  
355  
356  
357  
358  
359  
360



361 **Supplementary Figure 3. *FLT1* and *VEGFA* gene expression in critical care patients.** Probe intensities  
 362 of expression arrays obtained from peripheral blood samples from ICU controls (n=34), systemic  
 363 inflammatory response syndrome (SIRS, n=21), sepsis (n=30) and sepsis-associated ARDS patients (n=18)  
 364 at study inclusion. Note that the probe ILMN\_1752307 targets *FLT1* exon 30, which is found in the  
 365 canonical isoform (*FLT1*-201), one of the most highly expressed isoforms of the gene. Differences in  
 366 average intensities were assessed using ANOVA followed by t-tests. GEO accession: GSE32707.<sup>23</sup>  
 367

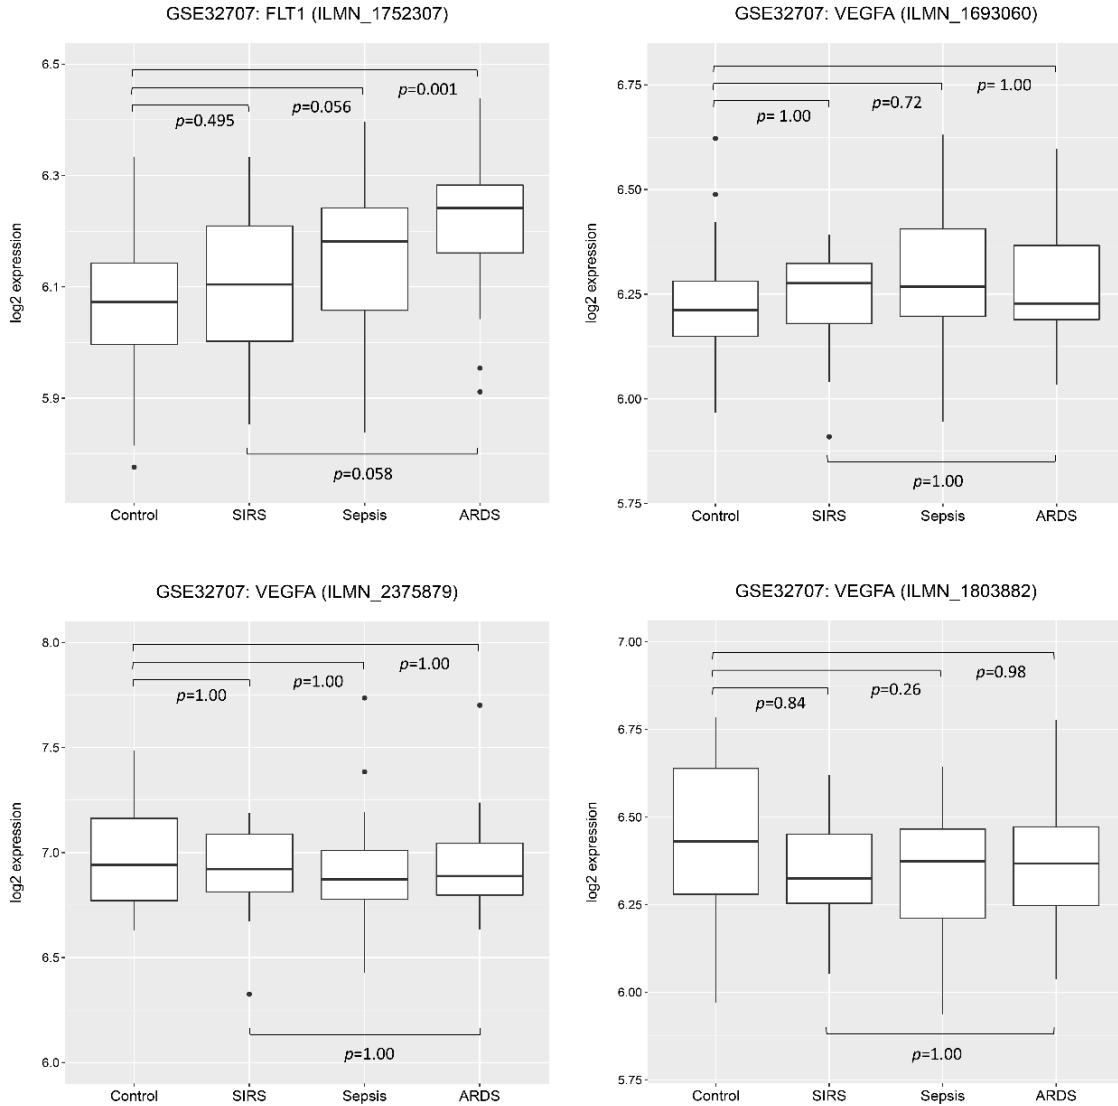

368

369

370

371

372

373

374

375

376

377

378

379

380

381

382 **Supplementary Tables**  
383

384 **Supplementary Table 1. Top 53 independent SNPs associated with ARDS in the discovery stage**  
385 **( $p < 5 \cdot 0 \times 10^{-5}$ ).**

| Variant     | Chr | Position (hg19) | Gene                   | A1/A2 | MAF   | OR [95% CI]       | p-value                     |
|-------------|-----|-----------------|------------------------|-------|-------|-------------------|-----------------------------|
| rs598782    | 1   | 202572596       | <i>SYT2</i>            | T/C   | 0.173 | 0.49 [0.35, 0.69] | $3 \cdot 16 \times 10^{-5}$ |
| rs10917581  | 1   | 162624504       | <i>DDR2</i>            | G/A   | 0.262 | 0.56 [0.42, 0.74] | $4 \cdot 37 \times 10^{-5}$ |
| rs56865040  | 2   | 30907832        | <i>LCLAT1-CAPN13</i>   | G/A   | 0.066 | 3.35 [1.95, 5.77] | $1 \cdot 24 \times 10^{-5}$ |
| rs58982889  | 3   | 85080936        | <i>CADM2</i>           | C/G   | 0.483 | 0.57 [0.44, 0.73] | $1 \cdot 37 \times 10^{-5}$ |
| rs12494792  | 3   | 54631523        | <i>CACNA2D3</i>        | A/G   | 0.251 | 1.82 [1.38, 2.40] | $2 \cdot 52 \times 10^{-5}$ |
| rs71331755  | 3   | 134040335       | <i>RYK-AMOTL2</i>      | C/G   | 0.237 | 1.83 [1.37, 2.43] | $3 \cdot 20 \times 10^{-5}$ |
| rs76763432  | 4   | 20933002        | <i>KCNIP4</i>          | T/C   | 0.114 | 2.36 [1.60, 3.48] | $1 \cdot 38 \times 10^{-5}$ |
| rs12513121  | 4   | 126763999       | <i>FAT4-INTU</i>       | A/C   | 0.302 | 0.55 [0.43, 0.72] | $1 \cdot 48 \times 10^{-5}$ |
| rs11097547  | 4   | 77763070        | <i>SHROOM3-SOWAHB</i>  | G/A   | 0.200 | 1.95 [1.44, 2.64] | $1 \cdot 51 \times 10^{-5}$ |
| rs78119818  | 4   | 78068598        | <i>CCNI-CCNG2</i>      | A/T   | 0.048 | 3.79 [2.03, 7.06] | $2 \cdot 81 \times 10^{-5}$ |
| rs10518480  | 4   | 126898260       | <i>FAT4-INTU</i>       | G/A   | 0.202 | 1.93 [1.41, 2.64] | $3 \cdot 46 \times 10^{-5}$ |
| rs66691935  | 4   | 184540486       | <i>ING2-RWDD4</i>      | T/C   | 0.175 | 1.97 [1.43, 2.71] | $3 \cdot 67 \times 10^{-5}$ |
| rs62300402  | 4   | 66422737        | <i>EPHA5</i>           | G/A   | 0.276 | 0.56 [0.42, 0.74] | $4 \cdot 46 \times 10^{-5}$ |
| rs66486976  | 5   | 177602232       | <i>NHP2-GMCL2</i>      | T/C   | 0.313 | 0.55 [0.42, 0.71] | $1 \cdot 00 \times 10^{-5}$ |
| rs58681704  | 5   | 133268913       | <i>FSTL4-C5orf15</i>   | A/G   | 0.202 | 0.51 [0.37, 0.70] | $3 \cdot 18 \times 10^{-5}$ |
| rs62390494  | 5   | 177493565       | <i>FAM153C-N4BP3</i>   | T/C   | 0.199 | 1.90 [1.40, 2.60] | $4 \cdot 53 \times 10^{-5}$ |
| rs9453845   | 6   | 67330152        | <i>EYS-ADGRB3</i>      | T/G   | 0.107 | 0.41 [0.27, 0.62] | $2 \cdot 81 \times 10^{-5}$ |
| rs3003179   | 6   | 74677167        | <i>CD109-COL12A1</i>   | A/G   | 0.279 | 1.76 [1.35, 2.30] | $3 \cdot 20 \times 10^{-5}$ |
| rs58277258  | 6   | 129194762       | <i>LAMA2</i>           | C/T   | 0.084 | 2.69 [1.68, 4.30] | $3 \cdot 88 \times 10^{-5}$ |
| rs12197618  | 6   | 85969855        | <i>TBX18-NT5E</i>      | A/G   | 0.053 | 3.58 [1.95, 6.57] | $4 \cdot 01 \times 10^{-5}$ |
| rs9367172   | 6   | 43709993        | <i>MRPS18A-VEGFA</i>   | A/G   | 0.237 | 0.55 [0.41, 0.73] | $4 \cdot 69 \times 10^{-5}$ |
| rs72611587  | 7   | 146905995       | <i>CNTNAP2</i>         | T/C   | 0.140 | 2.16 [1.51, 3.09] | $2 \cdot 78 \times 10^{-5}$ |
| rs7777943   | 7   | 150483237       | <i>GIMAP5-TMEM176B</i> | G/A   | 0.277 | 0.57 [0.44, 0.74] | $3 \cdot 18 \times 10^{-5}$ |
| rs12678166  | 8   | 8520530         | <i>PRAG1-CLDN23</i>    | T/C   | 0.152 | 2.05 [1.46, 2.89] | $3 \cdot 80 \times 10^{-5}$ |
| rs796455145 | 9   | 5487547         | <i>PLGRKT</i>          | C/T   | 0.411 | 1.74 [1.37, 2.22] | $7 \cdot 49 \times 10^{-6}$ |
| rs4740791   | 9   | 4611901         | <i>SPATA6L</i>         | T/C   | 0.087 | 2.62 [1.66, 4.12] | $3 \cdot 14 \times 10^{-5}$ |
| rs2734600   | 9   | 33753355        | <i>PRSS3</i>           | T/C   | 0.152 | 0.48 [0.33, 0.68] | $3 \cdot 76 \times 10^{-5}$ |
| rs1751276   | 10  | 4477665         | <i>KLF6-AKR1E2</i>     | A/G   | 0.123 | 2.53 [1.70, 3.77] | $4 \cdot 85 \times 10^{-6}$ |
| rs1867966   | 10  | 71187839        | <i>TACR2-TSPAN15</i>   | G/A   | 0.430 | 0.58 [0.45, 0.74] | $1 \cdot 32 \times 10^{-5}$ |
| rs11195238  | 10  | 112388857       | <i>SMC3-RBM20</i>      | T/C   | 0.151 | 0.47 [0.33, 0.67] | $2 \cdot 97 \times 10^{-5}$ |
| rs10795549  | 10  | 7582855         | <i>SFMBT2-ITIH5</i>    | C/A   | 0.478 | 0.60 [0.47, 0.76] | $3 \cdot 02 \times 10^{-5}$ |
| rs10736526  | 11  | 122589092       | <i>UBASH3B</i>         | C/T   | 0.207 | 0.50 [0.37, 0.67] | $3 \cdot 73 \times 10^{-6}$ |
| rs61710829  | 11  | 126566557       | <i>KIRREL3</i>         | G/C   | 0.378 | 1.71 [1.33, 2.20] | $3 \cdot 07 \times 10^{-5}$ |
| rs602124    | 11  | 69388853        | <i>MYEOV-CCND1</i>     | C/G   | 0.297 | 1.77 [1.35, 2.31] | $3 \cdot 15 \times 10^{-5}$ |
| rs76921243  | 12  | 26606699        | <i>ITPR2</i>           | A/G   | 0.056 | 0.25 [0.13, 0.47] | $1 \cdot 81 \times 10^{-5}$ |
| rs1861180   | 12  | 12958559        | <i>DDX47</i>           | T/C   | 0.088 | 0.40 [0.25, 0.62] | $4 \cdot 07 \times 10^{-5}$ |
| rs1904566   | 12  | 68125847        | <i>DYRK2-IFNG</i>      | C/A   | 0.420 | 1.69 [1.31, 2.17] | $4 \cdot 49 \times 10^{-5}$ |
| rs9508032   | 13  | 28995940        | <i>FLT1</i>            | T/C   | 0.288 | 0.49 [0.38, 0.65] | $2 \cdot 62 \times 10^{-7}$ |
| rs8001184   | 13  | 90603540        | <i>SLITRK5-GPC5</i>    | A/C   | 0.483 | 1.65 [1.30, 2.10] | $4 \cdot 48 \times 10^{-5}$ |
| rs946626    | 14  | 49140883        | <i>MDGA2-RPS29</i>     | A/G   | 0.428 | 1.73 [1.36, 2.20] | $8 \cdot 59 \times 10^{-6}$ |
| rs7161717   | 14  | 26389695        | <i>STXBP6-NOVA1</i>    | C/T   | 0.132 | 0.44 [0.30, 0.64] | $2 \cdot 54 \times 10^{-5}$ |
| rs4887263   | 15  | 86626153        | <i>AGBL1</i>           | A/C   | 0.096 | 2.73 [1.74, 4.28] | $1 \cdot 19 \times 10^{-5}$ |
| rs12902176  | 15  | 65518664        | <i>CILP-PARP16</i>     | G/A   | 0.268 | 1.78 [1.35, 2.35] | $4 \cdot 04 \times 10^{-5}$ |
| rs11647343  | 16  | 84454267        | <i>ATP2C2</i>          | C/A   | 0.384 | 1.75 [1.36, 2.24] | $1 \cdot 05 \times 10^{-5}$ |
| rs244783    | 16  | 84360055        | <i>WFDC1</i>           | T/G   | 0.212 | 1.97 [1.45, 2.69] | $1 \cdot 77 \times 10^{-5}$ |
| rs4791367   | 17  | 9724374         | <i>GLP2R</i>           | G/A   | 0.092 | 0.35 [0.22, 0.56] | $1 \cdot 25 \times 10^{-5}$ |
| rs9675656   | 18  | 2947220         | <i>LPIN2</i>           | C/G   | 0.109 | 2.44 [1.63, 3.66] | $1 \cdot 65 \times 10^{-5}$ |
| rs397195    | 19  | 6619504         | <i>CD70-TNFSF14</i>    | G/C   | 0.354 | 1.71 [1.32, 2.20] | $3 \cdot 44 \times 10^{-5}$ |

|           |    |          |                       |     |       |                   |                       |
|-----------|----|----------|-----------------------|-----|-------|-------------------|-----------------------|
| rs285251  | 19 | 16415993 | <i>AP1M1-KLF2</i>     | C/T | 0.286 | 0.56 [0.42, 0.74] | 4.00x10 <sup>-5</sup> |
| rs6040856 | 20 | 11702045 | <i>JAG1-BTBD3</i>     | G/C | 0.354 | 1.68 [1.32, 2.15] | 3.16x10 <sup>-5</sup> |
| rs2831537 | 21 | 29516376 | <i>ADAMTS5-N6AMT1</i> | T/C | 0.462 | 0.57 [0.45, 0.73] | 7.65x10 <sup>-6</sup> |
| rs4817154 | 21 | 28477085 | <i>ADAMTS5-N6AMT1</i> | A/G | 0.082 | 2.59 [1.64, 4.10] | 4.57x10 <sup>-5</sup> |
| rs1155955 | X  | 67297091 | <i>OPHN1</i>          | G/A | 0.120 | 3.12 [1.83, 5.31] | 2.87x10 <sup>-5</sup> |

A1, Effect allele; A2, Non-effect allele; CI, Confidence Interval; MAF, Minor Allele Frequency; OR, Odd Ratio.

386  
387  
388  
389  
390  
391  
392  
393  
394  
395  
396  
397  
398  
399  
400  
401  
402  
403  
404  
405  
406  
407  
408  
409  
410  
411  
412  
413  
414

**Supplementary Table 2. Main demographic and clinical features of individuals included in the study.**

|                                                                  | GEN-SEP            |                    |                       | MESSI              |                    |                       | SepNet             |                  |                      | Comparison between studies |                        |
|------------------------------------------------------------------|--------------------|--------------------|-----------------------|--------------------|--------------------|-----------------------|--------------------|------------------|----------------------|----------------------------|------------------------|
|                                                                  | Controls (n=316)   | Cases (n=274)      | <i>p</i> -value*      | Controls (n=337)   | Cases (n=268)      | <i>p</i> -value*      | Controls (n=649)   | Cases (n=91)     | <i>p</i> -value*     | Controls <i>p</i> -value*  | Cases <i>p</i> -value* |
| Sex (n males/N)                                                  | 197/316<br>(62.3%) | 194/274<br>(70.8%) | 0.04                  | 200/337<br>(59.3%) | 163/268<br>(60.8%) | 0.74                  | 379/649<br>(58.4%) | 59/91<br>(64.8%) | 0.50                 | 0.50                       | 0.05                   |
| Mean age (years)                                                 | 63.0 ± 15.0        | 62.5 ± 14.1        | 0.47                  | 61.5 ± 13.8        | 58.8 ± 14.1        | 0.02                  | 65.4 ± 14.1        | 62.1 ± 13.6      | 0.02                 | 0.04                       | 0.88                   |
| Pneumonia (n/N)                                                  | 83/267<br>(31.1%)  | 128/252<br>(50.8%) | 7.50x10 <sup>-6</sup> | 134/337<br>(39.8%) | 166/268<br>(61.9%) | 1.2x10 <sup>-7</sup>  | 249/646<br>(38.5%) | 49/91<br>(53.8%) | 5.0x10 <sup>-3</sup> | 0.05                       | 0.03                   |
| APACHE (median) (P <sub>25</sub> -P <sub>75</sub> ) <sup>†</sup> | 20 (15-24)         | 22 (18-27)         | 2.22x10 <sup>-5</sup> | 71 (57-88)         | 85 (67-104)        | 1.4x10 <sup>-7</sup>  | 20 (16-24)         | 19 (16-23)       | 0.47                 | 0.42                       | 1.6x10 <sup>-3</sup>   |
| Mortality (n/N) <sup>‡</sup>                                     | 79/310<br>(25.5%)  | 115/268<br>(42.9%) | 1.5x10 <sup>-5</sup>  | 127/337<br>(37.7%) | 182/268<br>(67.9%) | 2.2x10 <sup>-13</sup> | 137/649<br>(21.1%) | 12/91<br>(13.2%) | 0.08                 | -                          | -                      |

n=number of individuals with data available, N=group size. All individuals have age and APACHE data, except for MESSI cohort, where only 229 cases and 269 controls have APACHE data. \*Categorical data compared by chi square test, continuous data compared by Wilcoxon test (two-sample comparison) or Kruskal-Wallis test (three-sample comparison); <sup>†</sup>APACHE III was measured for the MESSI Cohort and APACHE II for GENSEP and SepNet Cohorts. Therefore, only APACHE II scores were considered in the comparison between studies; <sup>‡</sup>Patient mortality was not compared between studies since ICU mortality was considered for the GENSEP cohort, 30-day mortality was considered for the MESSI Cohort, and 28-day mortality for the SepNet cohort. APACHE, Acute Physiology and Chronic Health Evaluation; P<sub>25</sub>, percentile 25; P<sub>75</sub>, percentile 75.

**Supplementary Table 3. Sensitivity analysis for the rs9508032 in the three cohorts together.**

|                                       | OR [95% CI]       | <i>p</i> -value         |
|---------------------------------------|-------------------|-------------------------|
| Unadjusted*                           | 0.62 [0.43, 0.90] | 1.07x10 <sup>-7</sup>   |
| Sex                                   | 0.62 [0.43, 0.90] | 1.11x10 <sup>-7</sup>   |
| Age                                   | 0.62 [0.43, 0.90] | 1.30x10 <sup>-7</sup>   |
| APACHE <sup>†</sup>                   | 0.61 [0.40, 0.93] | 1.81x10 <sup>-8</sup>   |
| Smokers <sup>‡</sup>                  | 0.58 [0.42, 0.80] | 9.72x10 <sup>-4††</sup> |
| Previous surgery <sup>§</sup>         | 0.64 [0.50, 0.83] | 7.35x10 <sup>-4††</sup> |
| Ischemic cardiac disease <sup>§</sup> | 0.56 [0.45, 0.70] | 3.05x10 <sup>-7‡‡</sup> |
| Pulmonary sepsis                      | 0.61 [0.41, 0.91] | 9.12x10 <sup>-8‡‡</sup> |
| Mortality <sup>¶</sup>                | 0.62 [0.41, 0.94] | 2.51x10 <sup>-7</sup>   |
| Pathogen <sup>‡</sup>                 | 0.48 [0.34, 0.68] | 2.34x10 <sup>-5††</sup> |
| Multi organ dysfunction <sup>  </sup> | 0.61 [0.41, 0.91] | 1.03x10 <sup>-7</sup>   |
| Comorbidities <sup>**</sup>           | 0.62 [0.40, 0.94] | 1.56x10 <sup>-7‡‡</sup> |

\*Unadjusted data for GEN-SEP, adjustment for 2 PC for MESSI, and adjustment for 3 PC for SepNet; <sup>†</sup>APACHE III was measured for the MESSI Cohort and APACHE II for GEN-SEP and SepNet Cohorts; <sup>‡</sup>There was only information available for GEN-SEP study; <sup>§</sup>There was not information available for MESSI study; <sup>¶</sup>ICU mortality was considered for the GENSEP cohort, 30-day mortality was considered for the MESSI Cohort, and 28-day mortality for the SepNet cohort; <sup>||</sup>Two or more affected organs; <sup>\*\*</sup>For the GEN-SEP and SepNet studies, comorbidities considered are autoimmune diseases, cancer, chronic diseases, diabetes, hepatopathies, immunosuppression, kidney diseases, morbid obesity, pregnancy, severe infections, severe brain damage, and valvulopathies. For MESSI, comorbidities are defined as immunocompromise (cancer receiving treatment, hematologic malignancy, AIDS, metastatic cancer, or receiving immunosuppressive medication), cirrhosis, congestive heart failure, or chronic renal insufficiency including dialysis; <sup>††</sup>Missing data for more than 35% of individuals from the GEN-SEP study; <sup>‡‡</sup>Missing data for the 15-20% of individuals from the GEN-SEP study. APACHE, Acute Physiology and Chronic Health Evaluation; ICU, intensive care unit; OR, Odd Ratio; CI, Confidence Interval.

**Supplementary Table 4. Association results for all SNPs within *FLT1* that have data available in all studies.**

| rs ID            | Chr       | Position        | Location <sup>†</sup> | A1/A2      | MAF          | r <sup>2</sup> | Discovery (274:316)*     |                             | Replication (359:986)*   |                             | Meta-analysis (633:1302)* |                             |
|------------------|-----------|-----------------|-----------------------|------------|--------------|----------------|--------------------------|-----------------------------|--------------------------|-----------------------------|---------------------------|-----------------------------|
|                  |           |                 |                       |            |              |                | OR [95% CI]              | p-value                     | OR [95% CI]              | p-value                     | OR [95% CI]               | p-value                     |
| <b>rs9508032</b> | <b>13</b> | <b>28995940</b> | <b>Intron 10</b>      | <b>T/C</b> | <b>0.290</b> | <b>1.00</b>    | <b>0.49 [0.38, 0.65]</b> | <b>2.62x10<sup>-7</sup></b> | <b>0.74 [0.60, 0.92]</b> | <b>5.98x10<sup>-3</sup></b> | <b>0.61 [0.41, 0.91]</b>  | <b>5.18x10<sup>-8</sup></b> |
| rs8002446        | 13        | 28997400        | Intron 10             | A/G        | 0.288        | 1.00           | 0.50 [0.38, 0.65]        | 2.71x10 <sup>-7</sup>       | 0.75 [0.61, 0.92]        | 6.82x10 <sup>-3</sup>       | 0.61 [0.41, 0.92]         | 6.03x10 <sup>-8</sup>       |
| rs9513111        | 13        | 28997563        | Intron 10             | T/C        | 0.288        | 1.00           | 0.50 [0.38, 0.65]        | 2.71x10 <sup>-7</sup>       | 0.75 [0.61, 0.92]        | 6.82x10 <sup>-3</sup>       | 0.61 [0.41, 0.92]         | 6.03x10 <sup>-8</sup>       |
| rs722503         | 13        | 28997052        | Intron 10             | T/C        | 0.288        | 1.00           | 0.50 [0.38, 0.65]        | 2.71x10 <sup>-7</sup>       | 0.75 [0.61, 0.92]        | 6.94x10 <sup>-3</sup>       | 0.61 [0.41, 0.92]         | 6.11x10 <sup>-8</sup>       |
| rs9508034        | 13        | 28996604        | Intron 10             | C/A        | 0.290        | 1.00           | 0.49 [0.38, 0.65]        | 2.62x10 <sup>-7</sup>       | 0.75 [0.61, 0.93]        | 7.58x10 <sup>-3</sup>       | 0.61 [0.41, 0.92]         | 6.47x10 <sup>-8</sup>       |
| rs9508033        | 13        | 28996568        | Intron 10             | C/T        | 0.290        | 0.99           | 0.49 [0.38, 0.65]        | 2.62x10 <sup>-7</sup>       | 0.75 [0.61, 0.92]        | 7.19x10 <sup>-3</sup>       | 0.61 [0.41, 0.92]         | 6.18x10 <sup>-8</sup>       |
| rs6491284        | 13        | 28995390        | Intron 10             | T/C        | 0.288        | 0.98           | 0.50 [0.38, 0.65]        | 3.26x10 <sup>-7</sup>       | 0.76 [0.61, 0.94]        | 9.91x10 <sup>-3</sup>       | 0.62 [0.41, 0.93]         | 1.05x10 <sup>-7</sup>       |
| rs2281827        | 13        | 29001721        | Intron 9              | T/C        | 0.265        | 0.86           | 1.97 [1.49, 2.60]        | 1.60x10 <sup>-6</sup>       | 1.37 [1.10, 1.70]        | 4.20x10 <sup>-3</sup>       | 1.63 [1.14, 2.32]         | 1.69x10 <sup>-7</sup>       |
| rs7324510        | 13        | 29007035        | Intron 6              | A/C        | 0.242        | 0.72           | 0.54 [0.40, 0.72]        | 3.17x10 <sup>-5</sup>       | 0.69 [0.55, 0.86]        | 1.01x10 <sup>-3</sup>       | 0.63 [0.53, 0.75]         | 2.81x10 <sup>-7</sup>       |
| rs9513115        | 13        | 29011570        | Intron 4              | A/C        | 0.246        | 0.72           | 0.55 [0.41, 0.73]        | 4.17x10 <sup>-5</sup>       | 0.69 [0.55, 0.86]        | 1.12x10 <sup>-3</sup>       | 0.63 [0.53, 0.75]         | 3.69x10 <sup>-7</sup>       |
| rs9513114        | 13        | 29009059        | Intron 4              | T/C        | 0.245        | 0.71           | 0.52 [0.39, 0.70]        | 1.15x10 <sup>-5</sup>       | 0.70 [0.56, 0.88]        | 1.76x10 <sup>-3</sup>       | 0.63 [0.53, 0.75]         | 2.62x10 <sup>-7</sup>       |
| rs8001784        | 13        | 29009213        | Intron 4              | G/A        | 0.242        | 0.71           | 0.54 [0.40, 0.72]        | 3.17x10 <sup>-5</sup>       | 0.69 [0.56, 0.87]        | 1.28x10 <sup>-3</sup>       | 0.63 [0.53, 0.75]         | 3.68x10 <sup>-7</sup>       |
| rs4771249        | 13        | 29013414        | Intron 3              | C/G        | 0.241        | 0.71           | 0.54 [0.41, 0.73]        | 3.84x10 <sup>-5</sup>       | 0.70 [0.56, 0.87]        | 1.36x10 <sup>-3</sup>       | 0.63 [0.53, 0.76]         | 4.53x10 <sup>-7</sup>       |
| rs9508035        | 13        | 29009099        | Intron 4              | A/C        | 0.242        | 0.71           | 0.54 [0.40, 0.72]        | 3.17x10 <sup>-5</sup>       | 0.70 [0.56, 0.88]        | 1.76x10 <sup>-3</sup>       | 0.64 [0.53, 0.76]         | 5.37x10 <sup>-7</sup>       |
| rs3794405        | 13        | 29006847        | Intron 6              | T/C        | 0.243        | 0.71           | 0.54 [0.41, 0.73]        | 4.16x10 <sup>-5</sup>       | 0.70 [0.56, 0.87]        | 1.29x10 <sup>-3</sup>       | 0.64 [0.53, 0.76]         | 4.56x10 <sup>-7</sup>       |
| rs9505994        | 13        | 29024346        | Intron 3              | G/A        | 0.239        | 0.71           | 0.53 [0.40, 0.71]        | 2.41x10 <sup>-5</sup>       | 0.69 [0.55, 0.86]        | 1.10x10 <sup>-3</sup>       | 0.63 [0.53, 0.75]         | 2.53x10 <sup>-7</sup>       |
| rs34961350       | 13        | 28991902        | Intron 10             | G/C        | 0.220        | 0.57           | 1.89 [1.41, 2.54]        | 2.38x10 <sup>-5</sup>       | 1.27 [1.00, 1.60]        | 5.02x10 <sup>-2</sup>       | 1.53 [1.03, 2.27]         | 2.55x10 <sup>-5</sup>       |

\*Cases:Controls; <sup>†</sup>According to the principal *FLT1* transcript (ENST00000282397.8) ; A1, Effect allele; A2, Non-effect allele; CI, Confidence Interval; MAF, Minor Allele Frequency (GEN-SEP cohort) ; OR, Odd Ratio; r<sup>2</sup>, squared coefficient of correlation (with respect to rs9508032). Alleles referred to the positive strand of hg19. The top hit is indicated in bold.

**Supplementary Table 5. Prediction of ICU survival for the sentinel variant at *FLT1* in GEN-SEP**

|        | <b>OR [95% CI]</b> | <b><i>p</i>-value</b> |
|--------|--------------------|-----------------------|
| Sepsis | 1·00 [0·81, 1·24]  | 0·974                 |
| ARDS   | 1·16 [0·87, 1·54]  | 0·307                 |

Data were obtained using Cox regression models adjusted for age, sex, and APACHE II scores. APACHE II, Acute Physiology and Chronic Health Evaluation II; ICU, intensive care unit; OR, Odd Ratio; CI, Confidence Interval.

**Supplementary Table 6. Expression of *FLT1* and *VEGFA* isoforms in lung tissue.**

| Name      | Average | SD    |
|-----------|---------|-------|
| FLT1-201  | 5,928   | 2,803 |
| FLT1-202  | 5       | 5     |
| FLT1-203  | 6       | 4     |
| FLT1-204  | 20      | 12    |
| FLT1-205  | 6       | 7     |
| FLT1-206  | 12      | 12    |
| FLT1-207  | 3,998   | 2,492 |
| FLT1-208  | 2       | 2     |
| VEGFA-203 | 0       | 0     |
| VEGFA-226 | 11      | 28    |
| VEGFA-209 | 0       | 0     |
| VEGFA-207 | 12      | 14    |
| VEGFA-205 | 3,804   | 3,543 |
| VEGFA-213 | 0       | 0     |
| VEGFA-228 | 5       | 12    |
| VEGFA-229 | 2,748   | 2,824 |
| VEGFA-208 | 0       | 0     |
| VEGFA-204 | 0       | 0     |
| VEGFA-227 | 1,804   | 3,203 |
| VEGFA-220 | 5       | 7     |
| VEGFA-202 | 0       | 0     |
| VEGFA-224 | 0       | 0     |
| VEGFA-222 | 1,536   | 1,704 |
| VEGFA-218 | 94      | 81    |
| VEGFA-225 | 9       | 27    |
| VEGFA-219 | 0       | 1     |
| VEGFA-223 | 1       | 4     |
| VEGFA-201 | 69      | 75    |
| VEGFA-206 | 1,232   | 1,325 |
| VEGFA-210 | 1       | 4     |
| VEGFA-221 | 1       | 1     |
| VEGFA-212 | 3,393   | 2,676 |
| VEGFA-215 | 4,193   | 3,631 |
| VEGFA-211 | 52      | 41    |
| VEGFA-214 | 83      | 105   |
| VEGFA-217 | 8       | 15    |
| VEGFA-216 | 161     | 158   |

No data was available for the isoforms FLT1-209, VEGFA-230, VEGFA-231, or VEGFA-232. SD, standard deviation. Values are given in counts per million.



**Supplementary Table 7. Functional annotation of the *FLT1* top hit (rs9508032) and the most promising two proxies.**

|                                                      | rs9508032                                                                                                                                                                        | rs722503                                                                                                                                                                                                                                                   | rs8002446                                                                                                                                                                             |
|------------------------------------------------------|----------------------------------------------------------------------------------------------------------------------------------------------------------------------------------|------------------------------------------------------------------------------------------------------------------------------------------------------------------------------------------------------------------------------------------------------------|---------------------------------------------------------------------------------------------------------------------------------------------------------------------------------------|
| Functional significance score predicted with DeepSEA | 0.13                                                                                                                                                                             | <0.05                                                                                                                                                                                                                                                      | 0.10                                                                                                                                                                                  |
| regulomedB Score                                     | (5) TF binding or Dnase peak                                                                                                                                                     | (3a) TF binding + any motif + Dnase peak                                                                                                                                                                                                                   | (4) TF binding + Dnase peak                                                                                                                                                           |
| Enhancer histone marks                               | H3K4me1 <sup>*</sup> , H3K27ac <sup>†</sup>                                                                                                                                      | H3K4me1 <sup>‡</sup> , H3K27ac <sup>§</sup>                                                                                                                                                                                                                | H3K4me1 <sup>¶</sup> , H3K27ac <sup>  </sup>                                                                                                                                          |
| Promoter histone marks                               | H3K4me3 <sup>**</sup> , H3K9ac <sup>††</sup>                                                                                                                                     | H3K4me3 <sup>‡‡</sup> , H3K9ac <sup>§§</sup>                                                                                                                                                                                                               | H3K4me3 <sup>¶¶</sup> , H3K9ac <sup>§§</sup>                                                                                                                                          |
| DNase                                                | HSC & B-cell, Monocytes-CD14+ RO01746 Primary Cells                                                                                                                              | HSC & B-cell, ES-deriv                                                                                                                                                                                                                                     | IMR90, iPSC, Blood & T-cell, HSC & B-cell, Epithelial, Thymus, Muscle, Fetal Kidney, Fetal Lung, Ovary, Placenta, GM12878 Lymphoblastoid Cells, Monocytes-CD14+ RO01746 Primary Cells |
| Altered regulatory motifs                            | Cdc5, Gfi-1, HNF1, Mef2                                                                                                                                                          | CCNT2, MAZR, NF-kappaB, Spz1                                                                                                                                                                                                                               | None                                                                                                                                                                                  |
| Proteins bound                                       | None                                                                                                                                                                             | POL2, NFKB                                                                                                                                                                                                                                                 | BCL11A, EBF1, EBF1, ELF1, PAX5C20, PAX5N19, PU1, SP1, PU1, POL2, CMYC, MAX                                                                                                            |
| CHICP                                                | <u>CD34</u> : <i>POMP</i> (11-36); <u>GM12878</u> : <i>POMP</i> (9-71), <i>FLT1</i> (10-97), <i>SLC46A3/RNU6-53P</i> (9-91), <i>PAN3</i> (9-13), <i>SLC46A3/CYP51A1P2</i> (8-63) |                                                                                                                                                                                                                                                            |                                                                                                                                                                                       |
| Open Targets Genetics                                | None                                                                                                                                                                             | None                                                                                                                                                                                                                                                       | <i>FLT3</i> (top ranked), <i>POMP</i> , <i>PAN3</i>                                                                                                                                   |
| eQTLs                                                | None                                                                                                                                                                             | None                                                                                                                                                                                                                                                       | None                                                                                                                                                                                  |
| Score CAPE dsQTL >0.5                                | HUVEC, A549 EtOH 0.02pct Lung Carcinoma Cell Line                                                                                                                                | None                                                                                                                                                                                                                                                       | None                                                                                                                                                                                  |
| Score CAPE eQTL >0.5                                 | None                                                                                                                                                                             | HUVEC, NHLF Lung Fibroblast Primary Cells, NHDF-Adult Dermal Fibroblast Primary Cells, Monocytes-CD14+ RO01746 Primary Cells, A549 EtOH 0.02pct Lung Carcinoma Cell Line, Foreskin Fibroblast Primary Cells skin01, IMR90 fetal lung fibroblasts Cell Line | A549 EtOH 0.02pct Lung Carcinoma Cell Line                                                                                                                                            |

CAPE, Cellular dependent deactivating mutations; CD34, human hematopoietic progenitor cell line; GM12878, lymphoblastoid cell line; HUVEC, Human umbilical vein endothelial cell; IMR90, Human foetal lung cells; NHDF, Normal Human Dermal Fibroblasts; NHLF, Normal human lung fibroblasts. \*IMR90, ESC, iPSC, ES-deriv, Blood & T-cell, HSC & B-cell, Epithelial, Brain, Adipose, Muscle, Heart, Fetal Lung, Fetal Adrenal Gland, Liver, Spleen, GM12878 Lymphoblastoid Cells, HUVEC Umbilical Vein Endothelial Primary Cells, Monocytes-CD14+ RO01746 Primary Cells. †iPSC, ES-deriv, HSC & B-cell, Epithelial, Adipose, Spleen, GM12878 Lymphoblastoid Cells, HUVEC Umbilical Vein Endothelial Primary Cells. ‡IMR90, ESC, iPSC, ES-deriv, Blood & T-cell, HSC & B-cell, Epithelial, Thymus, Brain, Adipose, Muscle, Heart, Digestive, Fetal Lung, Fetal Adrenal Gland, Placenta, Liver, Lung, Spleen, Dnd41 TCell Leukemia Cell Line, GM12878 Lymphoblastoid Cells, HUVEC Umbilical Vein Endothelial Primary Cells, K562 Leukemia Cells, Monocytes-CD14+ RO01746 Primary Cells. §iPSC, HSC & B-cell, Brain, Adipose, Heart, Digestive, Liver, Dnd41 TCell Leukemia Cell Line, GM12878 Lymphoblastoid Cells, HUVEC Umbilical Vein Endothelial Primary Cells, Monocytes-CD14+ RO01746 Primary Cells. ¶ESC, iPSC, ES-deriv, Blood & T-cell, HSC & B-cell, Epithelial, Thymus, Brain, Adipose, Muscle, Heart, Digestive, Fetal Lung, Fetal Adrenal Gland, Placenta, Liver, Lung, Spleen, Dnd41 TCell Leukemia Cell Line, GM12878 Lymphoblastoid Cells, HUVEC Umbilical Vein Endothelial Primary Cells, Monocytes-CD14+ RO01746 Primary Cells. ||iPSC, HSC & B-cell, Epithelial, Brain, Adipose, Heart, Digestive, Ovary, Liver, Dnd41 TCell Leukemia Cell Line, GM12878 Lymphoblastoid Cells, HUVEC Umbilical Vein Endothelial Primary Cells, Monocytes-CD14+ RO01746 Primary Cells. \*\*HSC & B-cell, Monocytes-CD14+ RO01746 Primary Cells. ††iPSC, Adipose, Digestive. ‡‡Blood & T-cell, HSC & B-cell, Brain, Adipose, Heart, Digestive, Liver, Dnd41 TCell Leukemia Cell Line, GM12878 Lymphoblastoid Cells, Monocytes-CD14+ RO01746 Primary Cells. §§Blood & T-cell, Adipose, Sm. Muscle, Dnd41 TCell Leukemia Cell Line, GM12878 Lymphoblastoid Cells, Monocytes-CD14+ RO01746 Primary Cells. ¶¶Blood & T-cell, HSC & B-cell, Brain, Dnd41 TCell Leukemia Cell Line, GM12878 Lymphoblastoid Cells, Monocytes-CD14+ RO01746 Primary Cells

**Supplementary Table 8. Signals of replication at gene level in the GEN-SEP dataset within 100 kb of previously reported candidate genes.**

| Gene           | Independent signals | Gene-wise Bonferroni $p$ -value threshold | SNP min $p$ -value | A1/A2 | OR [95% CI]        | $p$ -value            |
|----------------|---------------------|-------------------------------------------|--------------------|-------|--------------------|-----------------------|
| <i>ABCC1</i>   | 275.18              | $1.82 \times 10^{-4}$                     | rs246233           | G/T   | 1.98 [1.21, 3.25]  | $6.79 \times 10^{-3}$ |
| <i>ACE</i>     | 72.94               | $6.85 \times 10^{-4}$                     | rs9857615          | T/C   | 0.70 [0.49, 0.98]  | $3.89 \times 10^{-2}$ |
| <i>ADA</i>     | 137.74              | $3.63 \times 10^{-4}$                     | rs17687734         | G/A   | 2.60 [1.31, 5.16]  | $6.31 \times 10^{-3}$ |
| <i>ADGRV1</i>  | 640.97              | $7.80 \times 10^{-5}$                     | rs6094023          | A/G   | 0.48 [0.29, 0.79]  | $3.65 \times 10^{-3}$ |
| <i>ADIPOQ</i>  | 288.87              | $1.73 \times 10^{-4}$                     | rs114210898        | A/G   | 1.34 [1.05, 1.72]  | $2.06 \times 10^{-2}$ |
| <i>ADRBK2</i>  | 318.26              | $1.57 \times 10^{-4}$                     | rs1467387          | C/T   | 0.67 [0.50, 0.89]  | $5.96 \times 10^{-3}$ |
| <i>AGER*</i>   | 363.32              | $1.38 \times 10^{-4}$                     | rs61746206         | T/C   | 0.32 [0.13, 0.83]  | $1.83 \times 10^{-2}$ |
| <i>AGT</i>     | 303.17              | $1.65 \times 10^{-4}$                     | rs1078499          | G/A   | 0.69 [0.53, 0.91]  | $8.68 \times 10^{-3}$ |
| <i>AGTR1</i>   | 281.4               | $1.78 \times 10^{-4}$                     | rs275643           | A/G   | 1.86 [1.24, 2.80]  | $2.70 \times 10^{-3}$ |
| <i>AHR</i>     | 201.39              | $2.48 \times 10^{-4}$                     | rs140084506        | T/C   | 4.69 [1.26, 17.4]  | $2.10 \times 10^{-2}$ |
| <i>ANGPT2</i>  | 456.67              | $1.09 \times 10^{-4}$                     | rs2442570          | A/G   | 0.43 [0.24, 0.76]  | $3.76 \times 10^{-3}$ |
| <i>APOA1</i>   | 236.49              | $2.11 \times 10^{-4}$                     | rs2513094          | C/T   | 1.36 [1.03, 1.79]  | $2.99 \times 10^{-2}$ |
| <i>ARSD</i>    | 159.08              | $3.14 \times 10^{-4}$                     | rs1698814          | C/T   | 1.45 [1.08, 1.96]  | $1.46 \times 10^{-2}$ |
| <i>BCL11A</i>  | 262.4               | $1.91 \times 10^{-4}$                     | rs76064527         | A/C   | 1.90 [1.08, 3.37]  | $2.69 \times 10^{-2}$ |
| <i>CBS</i>     | 160.35              | $3.12 \times 10^{-4}$                     | rs2401154          | T/C   | 1.49 [1.06, 2.08]  | $2.03 \times 10^{-2}$ |
| <i>CELF2</i>   | 669.82              | $7.46 \times 10^{-5}$                     | rs76209150         | T/G   | 2.65 [1.33, 5.26]  | $5.50 \times 10^{-3}$ |
| <i>CHIT1</i>   | 269.23              | $1.86 \times 10^{-4}$                     | rs1845466          | T/G   | 0.64 [0.49, 0.83]  | $8.63 \times 10^{-4}$ |
| <i>CLASRP</i>  | 113.15              | $4.42 \times 10^{-4}$                     | rs10405859         | C/T   | 0.71 [0.56, 0.91]  | $6.50 \times 10^{-3}$ |
| <i>CXCL2</i>   | 96.08               | $5.20 \times 10^{-4}$                     | rs28574621         | C/G   | 0.30 [0.09, 0.94]  | $3.85 \times 10^{-2}$ |
| <i>CXCR2</i>   | 98.44               | $5.08 \times 10^{-4}$                     | rs12989315         | A/G   | 2.26 [1.26, 4.07]  | $6.36 \times 10^{-3}$ |
| <i>CYP1A1</i>  | 82.88               | $6.03 \times 10^{-4}$                     | rs17861120         | G/A   | 0.51 [0.32, 0.83]  | $6.20 \times 10^{-3}$ |
| <i>DARC</i>    | 202.96              | $2.46 \times 10^{-4}$                     | rs55833893         | T/C   | 0.31 [0.14, 0.68]  | $3.66 \times 10^{-3}$ |
| <i>DIO2</i>    | 158.36              | $3.16 \times 10^{-4}$                     | rs17176215         | G/A   | 0.24 [0.07, 0.87]  | $2.96 \times 10^{-2}$ |
| <i>EGF</i>     | 240.96              | $2.08 \times 10^{-4}$                     | rs146141236        | C/T   | 0.22 [0.09, 0.55]  | $1.25 \times 10^{-3}$ |
| <i>EGLN1*</i>  | 144.18              | $3.47 \times 10^{-4}$                     | rs141921538        | T/C   | 4.56 [1.44, 14.39] | $9.75 \times 10^{-3}$ |
| <i>EPAS1</i>   | 417.3               | $1.20 \times 10^{-4}$                     | rs11888926         | G/C   | 1.65 [1.19, 2.28]  | $2.63 \times 10^{-3}$ |
| <i>F5</i>      | 269.74              | $1.85 \times 10^{-4}$                     | rs144628673        | A/G   | 5.37 [1.51, 19.05] | $9.37 \times 10^{-3}$ |
| <i>FAAH</i>    | 187.13              | $2.67 \times 10^{-4}$                     | rs78918625         | G/C   | 0.17 [0.04, 0.78]  | $2.30 \times 10^{-2}$ |
| <i>FAS</i>     | 239.16              | $2.09 \times 10^{-4}$                     | rs61852572         | G/A   | 0.60 [0.41, 0.89]  | $1.11 \times 10^{-2}$ |
| <i>FER*</i>    | 644.44              | $7.76 \times 10^{-5}$                     | rs10515395         | C/T   | 1.82 [1.22, 2.71]  | $3.28 \times 10^{-3}$ |
| <i>FTL</i>     | 143.23              | $3.49 \times 10^{-4}$                     | rs140747916        | T/A   | 1.70 [1.08, 2.66]  | $2.12 \times 10^{-2}$ |
| <i>FZD2</i>    | 125.26              | $3.99 \times 10^{-4}$                     | rs9900767          | T/C   | 0.50 [0.28, 0.90]  | $2.09 \times 10^{-2}$ |
| <i>GADD45A</i> | 184.53              | $2.71 \times 10^{-4}$                     | rs344923           | G/A   | 1.33 [1.05, 1.70]  | $1.92 \times 10^{-2}$ |
| <i>GHR</i>     | 322.68              | $1.55 \times 10^{-4}$                     | rs41271073         | A/G   | 0.34 [0.15, 0.74]  | $6.48 \times 10^{-3}$ |
| <i>GP5</i>     | 210.56              | $2.37 \times 10^{-4}$                     | rs7611390          | T/C   | 0.57 [0.41, 0.81]  | $1.63 \times 10^{-3}$ |
| <i>GRM3</i>    | 285.81              | $1.75 \times 10^{-4}$                     | rs6974073          | A/C   | 1.59 [1.02, 2.47]  | $4.01 \times 10^{-2}$ |
| <i>HAS1</i>    | 225.37              | $2.22 \times 10^{-4}$                     | rs113174648        | G/C   | 1.51 [1.12, 2.03]  | $7.03 \times 10^{-3}$ |
| <i>HECTD2</i>  | 174.41              | $2.87 \times 10^{-4}$                     | rs11186608         | T/G   | 0.71 [0.56, 0.89]  | $3.23 \times 10^{-3}$ |
| <i>HMOX1</i>   | 129.66              | $3.86 \times 10^{-4}$                     | rs4645773          | T/C   | 0.35 [0.16, 0.75]  | $6.49 \times 10^{-3}$ |
| <i>HMOX2</i>   | 119.94              | $4.17 \times 10^{-4}$                     | rs190300249        | T/C   | 0.34 [0.12, 0.93]  | $3.51 \times 10^{-2}$ |
| <i>HSPG2</i>   | 351.59              | $1.42 \times 10^{-4}$                     | rs72662414         | C/A   | 3.05 [1.03, 9.07]  | $4.50 \times 10^{-2}$ |
| <i>HTR2A</i>   | 286.1               | $1.75 \times 10^{-4}$                     | rs1923886          | T/C   | 1.54 [1.21, 1.96]  | $5.36 \times 10^{-4}$ |
| <i>IL10</i>    | 185.14              | $2.70 \times 10^{-4}$                     | rs79474100         | A/T   | 0.27 [0.10, 0.73]  | $9.99 \times 10^{-3}$ |
| <i>IL13</i>    | 86.87               | $5.76 \times 10^{-4}$                     | rs60153262         | T/C   | 2.94 [1.50, 5.77]  | $1.74 \times 10^{-3}$ |
| <i>IL18</i>    | 143.25              | $3.49 \times 10^{-4}$                     | rs360723           | T/A   | 0.69 [0.49, 0.96]  | $2.87 \times 10^{-2}$ |
| <i>IL1RN</i>   | 281.1               | $1.78 \times 10^{-4}$                     | rs6746416          | G/A   | 1.37 [1.07, 1.76]  | $1.28 \times 10^{-2}$ |
| <i>IL32</i>    | 70.73               | $7.07 \times 10^{-4}$                     | rs12598558         | G/T   | 0.58 [0.38, 0.89]  | $1.18 \times 10^{-2}$ |
| <i>IL4</i>     | 91.11               | $5.49 \times 10^{-4}$                     | rs60153262         | T/C   | 2.94 [1.50, 5.77]  | $1.74 \times 10^{-3}$ |
| <i>IL6</i>     | 236.93              | $2.11 \times 10^{-4}$                     | rs75897827         | A/G   | 2.70 [1.18, 6.21]  | $1.91 \times 10^{-2}$ |

|                      |               |                             |                  |            |                          |                             |
|----------------------|---------------|-----------------------------|------------------|------------|--------------------------|-----------------------------|
| <i>IL8</i>           | 154.71        | 3.23x10 <sup>-4</sup>       | rs7686667        | G/A        | 2.43 [1.06, 5.61]        | 3.69x10 <sup>-2</sup>       |
| <i>IRAK3</i>         | 186.89        | 2.68x10 <sup>-4</sup>       | rs569436368      | A/G        | 0.26 [0.09, 0.81]        | 2.05x10 <sup>-2</sup>       |
| <i>ISG15</i>         | 8.12          | 6.16x10 <sup>-3</sup>       | rs12093451       | A/C        | 0.50 [0.29, 0.88]        | 1.55x10 <sup>-2</sup>       |
| <i>KLK2</i>          | 201.25        | 2.48x10 <sup>-4</sup>       | rs1701934        | T/C        | 5.03 [1.65, 15.4]        | 4.61x10 <sup>-3</sup>       |
| <i>LRRCL16A</i>      | 781.8         | 6.40x10 <sup>-5</sup>       | rs2690123        | G/A        | 1.41 [1.11, 1.8]         | 5.64x10 <sup>-3</sup>       |
| <i>LTA</i>           | 459.6         | 1.09x10 <sup>-4</sup>       | rs45552734       | T/C        | 0.58 [0.41, 0.82]        | 2.40x10 <sup>-3</sup>       |
| <i>MAP3K1*</i>       | 262.39        | 1.91x10 <sup>-4</sup>       | rs1910019        | T/C        | 1.77 [1.25, 2.50]        | 1.30x10 <sup>-3</sup>       |
| <i>MAP3K6</i>        | 86.03         | 5.81x10 <sup>-4</sup>       | rs12742921       | C/T        | 0.72 [0.52, 0.99]        | 4.53x10 <sup>-2</sup>       |
| <i>MBL2</i>          | 250.05        | 2.00x10 <sup>-4</sup>       | rs34546527       | C/A        | 0.44 [0.28, 0.68]        | 2.50x10 <sup>-4</sup>       |
| <i>MIF</i>           | 141.4         | 3.54x10 <sup>-4</sup>       | rs75761219       | T/C        | 0.22 [0.06, 0.76]        | 1.72x10 <sup>-2</sup>       |
| <i>MUC5B*</i>        | 71.73         | 6.97x10 <sup>-4</sup>       | rs2071175        | T/C        | 2.10 [1.18, 3.74]        | 1.16x10 <sup>-2</sup>       |
| <i>MYLK</i>          | 307.19        | 1.63x10 <sup>-4</sup>       | rs16834826       | G/A        | 1.48 [1.15, 1.91]        | 2.45x10 <sup>-3</sup>       |
| <i>NAMPT</i>         | 238.31        | 2.10x10 <sup>-4</sup>       | rs56844330       | G/A        | 0.64 [0.47, 0.87]        | 5.02x10 <sup>-3</sup>       |
| <i>NFE2L2</i>        | 196.18        | 2.55x10 <sup>-4</sup>       | rs2588866        | T/C        | 0.51 [0.30, 0.87]        | 1.25x10 <sup>-2</sup>       |
| <i>NFKB1</i>         | 210.58        | 2.37x10 <sup>-4</sup>       | rs76615823       | G/A        | 3.21 [1.13, 9.14]        | 2.88x10 <sup>-2</sup>       |
| <i>NFKBIA</i>        | 254.35        | 1.97x10 <sup>-4</sup>       | rs75208350       | T/C        | 2.44 [1.15, 5.19]        | 2.01x10 <sup>-2</sup>       |
| <i>NOS3</i>          | 195.41        | 2.56x10 <sup>-4</sup>       | rs41307316       | A/G        | 0.22 [0.10, 0.51]        | 4.03x10 <sup>-4</sup>       |
| <i>NQO1</i>          | 143.23        | 3.49x10 <sup>-4</sup>       | rs116423606      | A/G        | 0.30 [0.09, 0.95]        | 3.98x10 <sup>-2</sup>       |
| <i>PDE4B</i>         | 530.28        | 9.43x10 <sup>-5</sup>       | rs6664875        | C/A        | 0.64 [0.48, 0.85]        | 1.96x10 <sup>-3</sup>       |
| <i>PI3</i>           | 142.59        | 3.51x10 <sup>-4</sup>       | rs877608         | A/T        | 1.98 [1.08, 3.63]        | 2.71x10 <sup>-2</sup>       |
| <i>PLAU</i>          | 116.57        | 4.29x10 <sup>-4</sup>       | rs72816344       | A/G        | 3.50 [1.08, 11.36]       | 3.73x10 <sup>-2</sup>       |
| <i>POPDC3</i>        | 181.91        | 2.75x10 <sup>-4</sup>       | rs1051484        | T/C        | 0.62 [0.46, 0.82]        | 1.12x10 <sup>-3</sup>       |
| <i>PPARGC1A</i>      | 978.39        | 5.11x10 <sup>-5</sup>       | rs6847465        | T/C        | 3.92 [1.51, 10.15]       | 4.96x10 <sup>-3</sup>       |
| <i>PPF1A1-SHANK2</i> | 881.08        | 5.67x10 <sup>-5</sup>       | rs11602848       | C/T        | 1.71 [1.20, 2.43]        | 3.01x10 <sup>-3</sup>       |
| <i>PRKAG2</i>        | 648.11        | 7.71x10 <sup>-5</sup>       | rs10231047       | C/T        | 0.71 [0.56, 0.89]        | 2.91x10 <sup>-3</sup>       |
| <i>SIPR3</i>         | 243.08        | 2.06x10 <sup>-4</sup>       | rs150901384      | G/T        | 4.57 [1.44, 14.5]        | 9.79x10 <sup>-3</sup>       |
| <i>SELPLG</i>        | 176.88        | 2.83x10 <sup>-4</sup>       | rs8179106        | A/G        | 1.77 [1.17, 2.66]        | 6.44x10 <sup>-3</sup>       |
| <i>SERPINE1</i>      | 207.41        | 2.41x10 <sup>-4</sup>       | rs73168394       | A/G        | 0.33 [0.17, 0.67]        | 2.22x10 <sup>-3</sup>       |
| <i>SFTPA1</i>        | 143.17        | 3.49x10 <sup>-4</sup>       | rs17886197       | G/T        | 1.60 [1.14, 2.26]        | 7.27x10 <sup>-3</sup>       |
| <i>SFTPA2</i>        | 166.37        | 3.01x10 <sup>-4</sup>       | rs17886197       | G/T        | 1.60 [1.14, 2.26]        | 7.27x10 <sup>-3</sup>       |
| <i>SFTPB</i>         | 165.98        | 3.01x10 <sup>-4</sup>       | rs75830997       | T/G        | 3.64 [1.51, 8.73]        | 3.86x10 <sup>-3</sup>       |
| <i>SFTPD</i>         | 222.05        | 2.25x10 <sup>-4</sup>       | rs7082484        | C/A        | 2.27 [1.22, 4.24]        | 9.55x10 <sup>-3</sup>       |
| <i>SOD3</i>          | 175.95        | 2.84x10 <sup>-4</sup>       | rs2361079        | C/T        | 0.59 [0.40, 0.85]        | 4.55x10 <sup>-3</sup>       |
| <i>STAT1</i>         | 161.06        | 3.10x10 <sup>-4</sup>       | rs4853453        | A/G        | 1.58 [1.12, 2.24]        | 9.30x10 <sup>-3</sup>       |
| <i>TGFB2</i>         | 244.72        | 2.04x10 <sup>-4</sup>       | rs75854892       | C/T        | 5.78 [1.60, 20.9]        | 7.43x10 <sup>-3</sup>       |
| <i>TIA1</i>          | 104.96        | 4.76x10 <sup>-4</sup>       | rs11694045       | G/T        | 1.42 [1.11, 1.82]        | 5.48x10 <sup>-3</sup>       |
| <i>TIRAP</i>         | 187.4         | 2.67x10 <sup>-4</sup>       | rs12283024       | A/G        | 0.34 [0.15, 0.78]        | 1.08x10 <sup>-2</sup>       |
| <i>TLR1</i>          | 227.88        | 2.19x10 <sup>-4</sup>       | rs193202734      | C/T        | 5.63 [1.86, 17.01]       | 2.20x10 <sup>-3</sup>       |
| <i>TNF</i>           | 448.83        | 1.11x10 <sup>-4</sup>       | rs45552734       | T/C        | 0.58 [0.41, 0.82]        | 2.40x10 <sup>-3</sup>       |
| <i>TNFRSF11A</i>     | 246.87        | 2.03x10 <sup>-4</sup>       | rs7235828        | A/G        | 0.65 [0.47, 0.89]        | 7.73x10 <sup>-3</sup>       |
| <i>TRAF6</i>         | 185.4         | 2.70x10 <sup>-4</sup>       | rs2458928        | A/G        | 0.68 [0.52, 0.89]        | 5.39x10 <sup>-3</sup>       |
| <i>UGT2B7</i>        | 186.83        | 2.68x10 <sup>-4</sup>       | rs139914109      | C/T        | 7.69 [1.65, 35.87]       | 9.42x10 <sup>-3</sup>       |
| <b><i>VEGFA</i></b>  | <b>262.98</b> | <b>1.90x10<sup>-4</sup></b> | <b>rs9367172</b> | <b>A/G</b> | <b>0.55 [0.41, 0.73]</b> | <b>4.69x10<sup>-5</sup></b> |
| <i>VLDLR</i>         | 375.76        | 1.33x10 <sup>-4</sup>       | rs10491716       | C/A        | 1.55 [1.19, 2.02]        | 1.20x10 <sup>-3</sup>       |
| <i>VWF</i>           | 403.43        | 1.24x10 <sup>-4</sup>       | rs2239160        | G/A        | 0.42 [0.26, 0.68]        | 3.28x10 <sup>-4</sup>       |
| <i>XKR3</i>          | 97.09         | 5.15x10 <sup>-4</sup>       | rs5994042        | A/T        | 3.23 [1.20, 8.71]        | 2.03x10 <sup>-2</sup>       |
| <i>ZNF335</i>        | 141.92        | 3.52x10 <sup>-4</sup>       | rs1736493        | G/A        | 0.53 [0.31, 0.89]        | 1.72x10 <sup>-2</sup>       |

A1, Effect allele; A2, Non-effect allele; CI, Confidence Interval; OR, Odds ratio for the effect alleles. In bold, genes harboring variants reaching the bonferroni threshold. \*Genes identified for this study (December 2015 to November 2018) based on the search of terms “acute respiratory distress syndrome”, “ARDS” OR “acute lung injury” with “polymorphism” OR “genetic variant”.
